# Supplementary material for: The DEL-1/β3 integrin axis promotes regulatory T cell responses during inflammation resolution
Source: JCI journal article supplement (doi:10.1172/jci137530), 2020-08-20
Supplement: sd1 [file 1]

301 Moved Permanently

# Moved Permanently

The document has moved here.
