# Supplementary material for: The DEL-1/β3 integrin axis promotes regulatory T cell responses during inflammation resolution
Source: JCI journal article supplement (doi:10.1172/jci137530), 2020-08-20
Supplement: sd1 [file 1]

# Supplemental File

## The DEL-1– $\beta 3$ integrin axis promotes regulatory T cell responses during inflammation resolution

Xiaofei Li<sup>1,§</sup>, Alessandra Colamatteo<sup>2,§</sup>, Lydia Kalafati<sup>3,4</sup>, Tetsuhiro Kajikawa<sup>1</sup>, Hui Wang<sup>1</sup>, Jong-Hyung Lim<sup>1</sup>, Khalil Bdeir<sup>5</sup>, Kyoung-Jin Chung<sup>3</sup>, Xiang Yu<sup>6</sup>, Clorinda Fusco<sup>2</sup>, Antonio Porcellini<sup>7</sup>, Salvatore De Simone<sup>8</sup>, Giuseppe Matarese<sup>2,8</sup>, Triantafyllos Chavakis<sup>3,‡</sup>, Veronica De Rosa<sup>8,9,‡,\*</sup>, and George Hajishengallis<sup>1,‡,\*</sup>

<sup>1</sup> Department of Basic and Translational Sciences, Laboratory of Innate Immunity and Inflammation, Penn Dental Medicine, University of Pennsylvania, Philadelphia, PA, USA.

<sup>2</sup> Treg Cell Lab, Dipartimento di Medicina Molecolare e Biotecnologie Mediche, Università degli Studi di Napoli "Federico II", Napoli, Italy.

<sup>3</sup> Institute for Clinical Chemistry and Laboratory Medicine, Faculty of Medicine, Technische Universität Dresden, Dresden, Germany.

<sup>4</sup> National Center for Tumor Diseases, Dresden, and German Cancer Research Center, Heidelberg, Germany.

<sup>5</sup> Department of Pathology and Laboratory Medicine, Perelman School of Medicine, University of Pennsylvania, Philadelphia, PA, USA.

<sup>6</sup> Department of Biology, University of Pennsylvania, Philadelphia, PA, USA.

<sup>7</sup> Dipartimento di Biologia, Università degli Studi di Napoli "Federico II", Complesso Universitario di Monte Santangelo, Napoli, Italy.

<sup>8</sup> Istituto per l'Endocrinologia e l'Oncologia Sperimentale, Consiglio Nazionale delle Ricerche (IEOS-CNR), Napoli, Italy.

<sup>9</sup> Unità di Neuroimmunologia, Fondazione Santa Lucia, Roma, Italy.

§ These authors contributed equally to the work

‡ These authors contributed equally as senior authors to the work

\* Corresponding authors. E-mail: [veronica.derosa@cnr.it](mailto:veronica.derosa@cnr.it) (VDR); [geoh@upenn.edu](mailto:geoh@upenn.edu) (GH)

This file includes:

Supplemental Material and Methods

References for Supplemental Material and Methods

Fig. S1. Flow cytometry gating strategy for oral tissues.

Fig. S2. Impaired resolution of periodontal inflammation in DEL-1–deficient mice.

Fig. S3. Treg frequencies and absolute numbers in gingiva, BAL, LNs, spleen and thymus under the steady state condition.

Fig. S4. DEL-1-Fc promotes inflammation resolution in periodontitis.

Fig. S5. Macrophage-derived DEL-1 increases Treg cell numbers while decreasing Th17 cell numbers during resolution of inflammation.

Fig. S6. DEL-1 has no direct effect on in vitro Th17 differentiation (IL-6+TGF $\beta$ 1 condition).

Fig. S7. DEL-1 promotes IL-10, CTLA-4, CD25 and ICOS expression in Treg cells in vivo.

Fig. S8. DEL-1 enhances FOXP3 stability.

Fig. S9. DEL-1 promotes FOXP3 expression in T cells cultured under Th17 differentiation conditions.

Fig. S10.  $\alpha v\beta 3$  expression on nTreg and iTreg cells.

Fig. S11. DEL-1 increases the expression of *FOXP3E2* and all *FOXP3* transcripts in human iTreg cells.

Fig. S12. DEL-1 does not affect the proliferation of nTreg and Tconv cells or the suppressive capacity of nTreg cells.

Table S1. Primers used for quantitative real-time PCR analysis.

Table S2. Primers used for quantitative real-time PCR analysis of human and mouse iTreg methylation.

## 53 **Supplemental Materials and Methods**

54

### 55 **Ligature-induced periodontitis / resolution model and cell isolation**

56 Ligature-induced periodontitis and resolution thereof was performed in mice as previously  
57 described (1, 2). Briefly, a 5-0 silk ligature was tied around the maxillary left second molar and  
58 the ligatures were removed on day 10 for 5 days. The mice were euthanized on day 10 or day 15.  
59 The contralateral molar tooth in each mouse was left unligated (baseline control). Starting on the  
60 day of ligature removal, DEL-1-Fc, mutants thereof, or Fc control were intra-gingivally  
61 microinjected daily at the ligated sites for a total of five doses. Gingival tissues around the area of  
62 ligature placement (and the contralateral control area) and cLNs were harvested on day 15 for  
63 analysis. On day 15, gingiva was dissected around the area of ligature placement and digested  
64 for 1h at 37°C with RPMI 1640 medium (Gibco) supplemented with collagenase IV (3.2 mg/ml,  
65 Gibco) and DNase (0.15 µg/ml, Sigma-Aldrich) (3). Single-cell suspensions were obtained by  
66 mashing the tissue against a strainer using plungers and filtered for staining and flow cytometry.

67

### 68 **Acute lung injury model**

69 Acute lung injury was induced as previously described (4). Briefly, after anesthesia with  
70 intraperitoneal ketamine and acetylpromazine, mice were instilled intratracheally with *Escherichia*  
71 *coli* LPS (3.75 µg/g mouse; O55:B5, Sigma-Aldrich) or PBS control via a 20-gauge catheter. Mice  
72 were sacrificed on day 10. BAL was obtained by cannulating the trachea with a 20-gauge catheter.  
73 The lung was lavaged with calcium-free PBS three times (each aliquot 0.7 ml). BAL was  
74 centrifuged at 600xg for 10 mins at 4°C. Total protein concentration in cell-free supernatants was  
75 measured by the Bradford method. Total cell number was counted with a hemocytometer after  
76 staining with trypan blue. Treg and Th17 cell numbers and frequencies in BAL and draining LNs  
77 were determined by FACS. For lung histology, after formalin fixation, lungs were embedded in

78 paraffin and 5- $\mu$ m sections were stained with hematoxylin and eosin. Lung injury was  
79 histologically evaluated by two investigators in a blinded fashion according to a semiquantitative  
80 scoring system (4): 1, normal; 2, focal (<50% of lung section) interstitial congestion and  
81 inflammatory cell infiltration; 3, diffuse (>50% of lung section) interstitial congestion and  
82 inflammatory cell infiltration; 4, focal (<50% of lung section) consolidation and inflammatory cell  
83 infiltration; 5, diffuse (>50% of lung section) consolidation and inflammatory cell infiltration (4).  
84 Data shown are the results from three representative sections of each mouse and the mean score  
85 was used for comparison between groups.

86

## 87 **Proteins**

88 Full-length human DEL-1 as a fusion protein with the human IgG1-Fc fragment (DEL-1-Fc), DEL-  
89 1 lacking the discoidin I-like domains (DEL-1[E1-E3]-Fc), and a point mutant of DEL-1 in which  
90 Asp [D] was replaced by Glu [E] in the RGD motif of the second EGF repeat (DEL-1[RGE]-Fc)  
91 were generated and purified as previously described (5). Fc protein control was purchased from  
92 R&D Systems. As human and mouse DEL-1 share 96% a.a. sequence and the two proteins have  
93 similar functions (2, 5-7), human DEL-1 was used in both human and mouse experimental  
94 systems.

95

## 96 **Mouse flow cytometry and antibodies**

97 Antibodies to the following mouse molecules were purchased from BioLegend: CD45 (clone 30-  
98 F11, catalog 103131), CD3 (145-2C11, catalog 100307), CD4 (GK1.5, catalog 100413, 100407),  
99 IL-17A (TC11-18H10.1, catalog 506916), CD51 (RMV-7, catalog 104105), CD61 (2C9.G2 [HM $\beta$ 3-  
100 1], catalog 104315), CD44 (IM7, catalog 103005), CD62L (MEL-14, catalog 104407), CD25 (3C7,  
101 catalog 101912), CD8 (53-6.7, catalog 100721), IL-10 (JES5-16E3, catalog 505007), ICOS  
102 (7E.17G9, catalog 117405), CTLA-4 (UC10-4B9, catalog 106309) and RUNX1 (RXDMC, catalog  
103 12-9816-80) from eBioscience. Function-blocking antibody to  $\alpha$ v $\beta$ 3 integrin (23C6, catalog 16-

104 0519-81) and IgG1 kappa isotype control (P3.6.2.8.1, catalog 16-4714-82) were from Invitrogen.  
105 Anti-mouse FOXP3 (clone FJK-16s, catalog 11-5773-82) was from eBioscience and Live/Dead  
106 fixable violet dead cell stain kit from Invitrogen. Mouse CD4<sup>+</sup> cells were stimulated or not with  
107 PMA (50 ng/ml; Sigma-Aldrich) and ionomycin (1.0 µg/ml; Sigma-Aldrich) in the presence of BD  
108 GolgiPlug (1 µl/ml media) for 3.5 hr at 37°C and 5% CO<sub>2</sub>. Then, following incubation with live/dead  
109 fixable dye (Invitrogen) to exclude dead cells, live cells were treated with low-endotoxin and azide-  
110 free purified anti-mouse CD16/32 antibody to block Fcγ III/II receptors (1:100; clone 93, catalog  
111 101330, BioLegend) for 10 mins at 4°C in the dark. Cells were then stained for surface markers  
112 for 30 mins at 4°C in the dark. The stained cells were further washed and fixed overnight. For  
113 intracellular staining of IL-17A, cells were permeabilized with intracellular fixation and  
114 permeabilization buffer set (eBioscience). For intracellular staining of FOXP3 alone or together  
115 with IL-10 or RUNX1, the cells were fixed and permeabilized with Foxp3/transcription factor  
116 staining buffer set (eBioscience). Cell acquisition was performed on a NovoCyte flow cytometer  
117 (ACEA Biosciences). Data were analyzed with NovoExpress® software (ACEA Biosciences) and  
118 FlowJo software (version 7.6.5, Tree Star).

119

## 120 **Quantitative real-time PCR**

121 Total cellular RNA was isolated from mouse tissues using Trizol (Life Technologies). For real-  
122 time PCR, 500 ng of total RNA was reverse-transcribed using High-Capacity RNA-to-cDNA Kit  
123 (Applied Biosystems) and real-time PCR with cDNA was performed using the Applied Biosystems  
124 7500 Fast Real-Time PCR System according to the manufacturer's protocol (Applied  
125 Biosystems). TaqMan probes and gene-specific primers (Supplemental Table 1; Thermo-Fisher)  
126 for detection and quantification of murine genes investigated in this study were purchased from  
127 Thermo-Fisher. Data were analyzed using the comparative ( $\Delta\Delta C_t$ ) method. For studies in the  
128 human system, total RNA was extracted from DEL-1-Fc- or Fc control-treated human iTregs using  
129 RNAqueous-4PCR (Thermo-Fisher). cDNA was synthesized in a 20 µl reaction volume containing

130 1 µg of total RNA, SuperScript IV VILO (Thermo-Fisher) or 200 units of SuperScript III Reverse  
131 Transcriptase (Thermo-Fisher) and 0.5 µl of random primers (200 ng/µl) (Roche). *FOXP3* all  
132 transcripts, *FOXP3* splicing variants containing the exon 2 (*FOXP3E2*), *RUNX1* and *CBFB*  
133 mRNAs were detected by using Taqman Universal Master Mix II, with UNG (Thermo-Fisher)  
134 according to the manufacturer's instruction, and analyzed with StepOnePlus™ Real-Time PCR  
135 System (Thermo-Fisher) or QuantStudio3 Real-Time PCR System (Thermo-Fisher). The internal  
136 probes assays have been designed over exon 1 - exon 2 boundaries to detect *FOXP3E2*, over  
137 exon 9 - exon 10 boundaries (a region not undergoing splicing) to detect *FOXP3* all transcripts.  
138 As internal standard control to perform normalization between samples, we used *18S* ribosomal  
139 RNA. TaqMan probes and gene-specific primers were from Thermo-Fisher (Supplemental Table  
140 1). The mRNA expression was expressed as relative amount compared to *18S* RNA using the  
141  $\Delta\text{Ct}$  method ( $2^{-\Delta\text{Ct}}$ );  $\Delta\text{Ct}$  is the difference in Ct between the gene of interest (*FOXP3* all  
142 transcripts, *FOXP3E2*, *RUNX1* and *CBFB*) and the endogenous control (*18S* RNA).

143

#### 144 **Human T cell flow cytometry, proliferation and CFSE staining**

145 Flow cytometric analysis of T cells was performed essentially as previously described (8). Tconv  
146 cells, stimulated for 36 hrs with anti-CD3/anti-CD28 mAb-coated beads (0.1 bead per cell;  
147 Thermo-Fisher) in the presence of DEL-1-Fc or Fc control (both at 10 µg/ml), were surface-stained  
148 with the following mAbs: APC-H7-conjugated anti-human CD4 (RPA-T4, catalog 560158), PE-  
149 Cy7-conjugated anti-human CD25 (M-A251, catalog 557741), both from BD Biosciences.  
150 Thereafter, cells were washed, fixed and permeabilized (Human Foxp3 Buffer Set; BD  
151 Pharmingen) and stained with following mAbs: PE-conjugated anti-human *FOXP3* from BD  
152 Biosciences (259D/C7, catalog 560046) that recognizes all splicing variants of *FOXP3* (through  
153 an epitope of the amino terminus of *FOXP3*), and PE-conjugated anti-human *FOXP3* from  
154 Thermo-Fisher (150D/E4, catalog 12-4774-42) that recognizes *FOXP3E2* through an epitope

155 present in the exon 2 only. Cells were analyzed with FACSCanto II (BD Biosciences). Analysis  
156 was performed with FlowJo software (versions 10.0.7 and 10.1, Tree Star). For T cell proliferation  
157 and suppression assays, CD4<sup>+</sup> T cells (90-95% pure) ( $2 \times 10^4$  cells per well) from healthy subjects  
158 were purified by magnetic cell separation with Dynabeads Untouched Human CD4 T Cells Kit  
159 (Thermo-Fisher). The fluorescent dye CFSE was used at a concentration of 1  $\mu$ g/ml (Invitrogen).  
160 Flow cytometry analyzing CFSE dilution was performed by gating on CD4<sup>+</sup>CFSE<sup>+</sup> cells stimulated  
161 for 72 hrs in round-bottomed 96-well plates (Corning Falcon) with anti-CD3/anti-CD28 mAb-  
162 coated beads (0.2 bead per cell; Thermo-Fisher) alone or cultured with DEL-1-Fc-iTregs or Fc-  
163 iTregs.

164

#### 165 **Methylation experiments**

166 The methylation status of the CpG island (specifically of the CpG motifs 394 and 224 as indicated  
167 by Floess et al (9) and corresponding to recognition sites for MspI and HpaII) within the CNS2  
168 region of *FOXP3* was evaluated in (i) human FACS-sorted iTregs cultured for 10 days with anti-  
169 CD3/anti-CD28 and IL-2 and (ii) sorted mouse iTregs cultured for 4 days with anti-CD3/anti-CD28  
170 and IL-2 plus TGF $\beta$ 1, in the presence of DEL-1-Fc or Fc control. Genomic DNA was extracted by  
171 using PureLink™ Genomic DNA Mini Kit (Thermo-Fisher). The methylation of the *FOXP3*-CNS2  
172 locus was determined using a method modified by von Kanel et al (10). Briefly, genomic DNA (1  
173  $\mu$ g) isolated from cells was digested overnight at 37°C with 20 U SacI and 20 U of HpaII or 10 U  
174 of MspI (BioLabs). On the same digestion, *FOXP3*, *H19* and *UBE2B* CpG islands were analyzed  
175 by QuantStudio3 Real-Time PCR System (Thermo-Fisher) with specific primer (Supplemental  
176 Table 2). *H19* (imprinted locus) and *UBE2B* (unmethylated locus) were used as control. Data  
177 were analyzed using the comparative ( $\Delta$ Ct) method. The degree of methylation of each locus was  
178 assigned according to the following equation: Methylation percentage =  $2^{-(Ct_{HpaII} - Ct_{sham})} \times 100$ , where  
179 Ct<sub>HpaII</sub> and Ct<sub>sham</sub> are the Cts of the reactions performed with and without HpaII, respectively.

180 The assay performance was assessed on internal controls from the same digestion (same  
181 tube): for each sample a scatterplot was constructed using the *H19*  $\Delta$ Ct (Ctsham-CtHpaII). A  
182 logarithmic trend line was constructed and the equation obtained was used to interpolate the  $\Delta$ Ct  
183 of CNS2. Results were calculated as % methylation of the CNS2 region.

184

185

186

187

188

189

190

191

192

193

194

195

196

197

198

199

200

201

202

203

204

205

206 **References for Supplemental Material and Methods**

207

- 208 1. Abe T, Hajishengallis G. Optimization of the ligature-induced periodontitis model in mice.  
209 *J Immunol Methods*. 2013;394(1-2):49-54.
- 210 2. Kourtzelis I, et al. DEL-1 promotes macrophage efferocytosis and clearance of  
211 inflammation. *Nat Immunol*. 2019;20(1):40-49.
- 212 3. Dutzan N, Abusleme L, Konkel JE, Moutsopoulos NM. Isolation, Characterization and  
213 Functional Examination of the Gingival Immune Cell Network. *J Vis Exp*.  
214 2016;(108):53736.
- 215 4. D'Alessio FR, et al. CD4+CD25+Foxp3+ Tregs resolve experimental lung injury in mice  
216 and are present in humans with acute lung injury. *J Clin Invest*. 2009;119(10):2898-  
217 2913.
- 218 5. Shin J, et al. DEL-1 restrains osteoclastogenesis and inhibits inflammatory bone loss in  
219 nonhuman primates. *Sci Transl Med*. 2015;7(307):307ra155.
- 220 6. Choi EY, et al. Del-1, an endogenous leukocyte-endothelial adhesion inhibitor, limits  
221 inflammatory cell recruitment. *Science*. 2008;322(5904):1101-1104.
- 222 7. Eskan MA, et al. The leukocyte integrin antagonist Del-1 inhibits IL-17-mediated  
223 inflammatory bone loss. *Nat Immunol*. 2012;13(5):465-473.
- 224 8. De Rosa V, et al. Glycolysis controls the induction of human regulatory T cells by  
225 modulating the expression of FOXP3 exon 2 splicing variants. *Nat Immunol*.  
226 2015;16(11):1174-1184.
- 227 9. Floess S, et al. Epigenetic control of the foxp3 locus in regulatory T cells. *PLoS Biol*.  
228 2007;5(2):e38.
- 229 10. von Kanel T, et al. Quantitative 1-Step DNA Methylation Analysis with Native Genomic  
230 DNA as Template. *Clin Chem*. 2010;56(7):1098-1106.

231



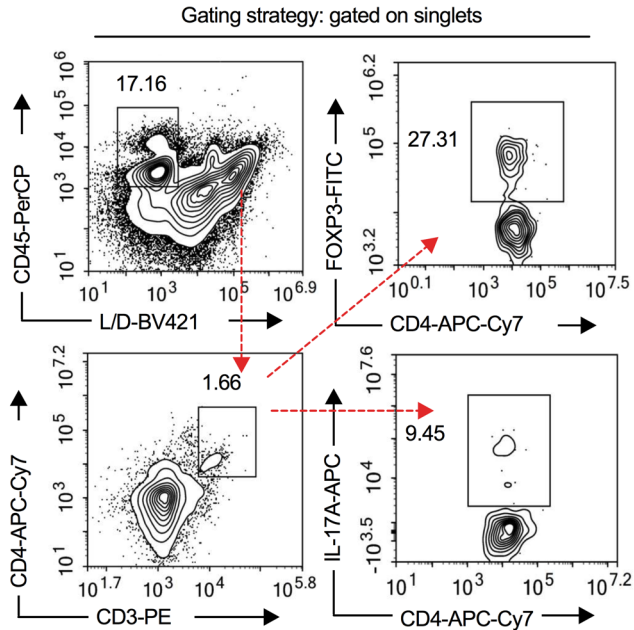

232  
 233  
 234  
 235  
 236  
 237  
 238  
 239  
 240  
 241  
 242  
 243  
 244  
 245  
 246

**Supplemental Figure 1. Flow cytometry gating strategy for oral tissues.** Groups of wild-type (WT) mice were subjected to ligature-induced periodontitis for 10 days and ligatures were removed on day 10 for 5 days to enable inflammation resolution. Representative FACS plot showing the gating strategy for Treg and Th17 cells present in WT mouse gingival tissues on day 15. FACS analysis of cervical lymph nodes followed the same strategy.

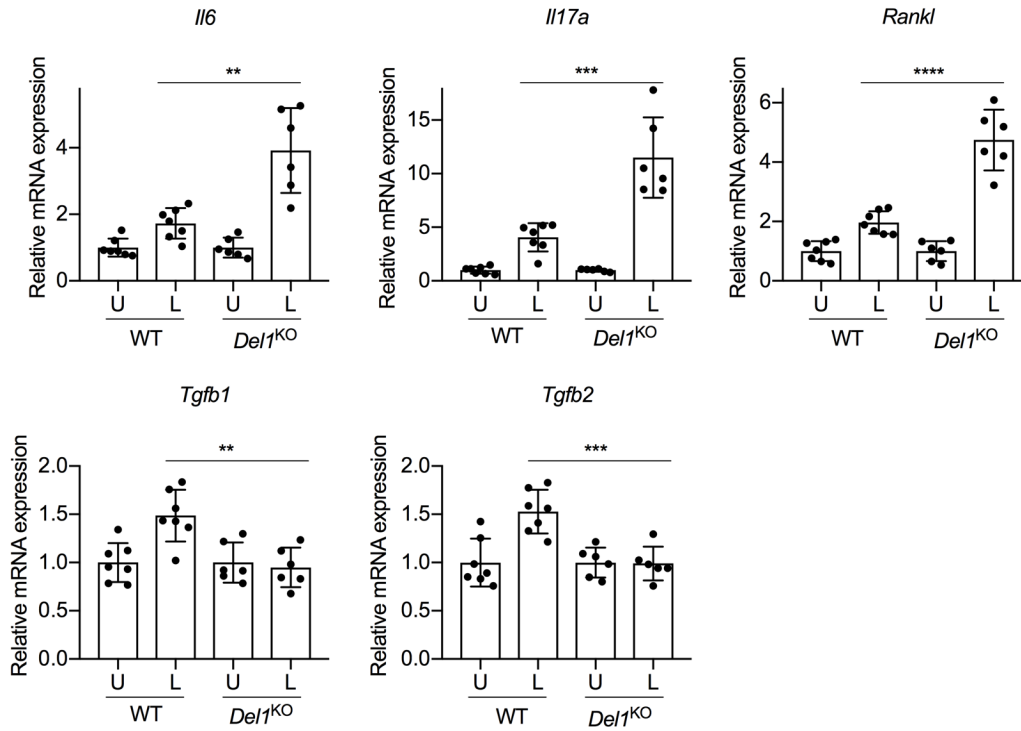

247  
 248  
 249  
 250  
 251  
 252  
 253  
 254  
 255  
 256  
 257  
 258  
 259

**Supplemental Figure 2. Impaired resolution of periodontal inflammation in DEL-1-deficient mice.** Groups of littermate wild-type (WT) and *Del1*<sup>KO</sup> mice were subjected to ligature-induced periodontitis (LIP) for 10 days and ligatures were removed on day 10 for 5 days. Relative mRNA expression of indicated molecules in gingival tissues of littermate WT and *Del1*<sup>KO</sup> mice on day 15 ( $n=7$  mice for WT group and  $n=6$  mice for KO group). Data were normalized to *Gapdh* mRNA and are presented as fold change relative to baseline (unligated sites), set as 1. Data are means  $\pm$  SD and are pooled from two independent experiments. \*\* $P<0.01$ , \*\*\* $P<0.001$ , \*\*\*\* $P<0.0001$  vs. ligated sides of WT mice. Two-tailed Student's t-test. U, unligated; L, ligated.

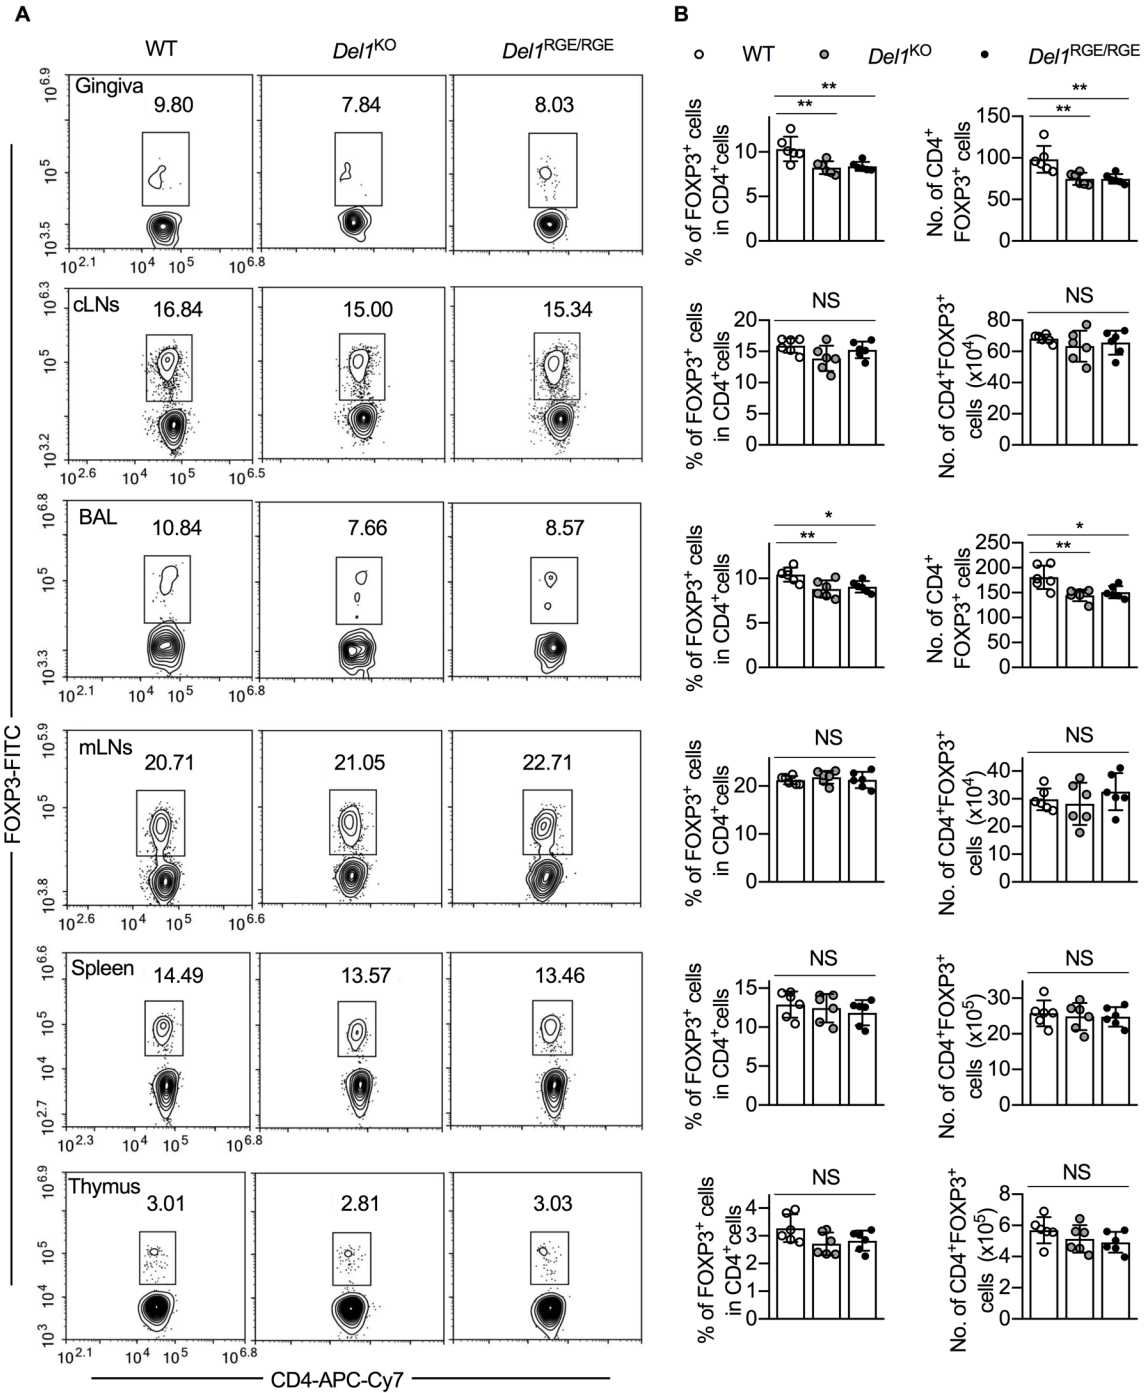

260  
261  
262  
263  
264  
265  
266  
267

**Supplemental Figure 3. Treg frequencies and absolute numbers in gingiva, BAL, LNs, spleen and thymus under the steady state condition.** Treg frequencies and absolute numbers in groups of wild-type (WT), *Del1*<sup>KO</sup> or *Del1*<sup>RGE/RGE</sup> mice were determined by FACS analysis. **(A)** Representative FACS plot of Treg cells; **(B)** data analysis of the percentages and absolute numbers of Treg cells.

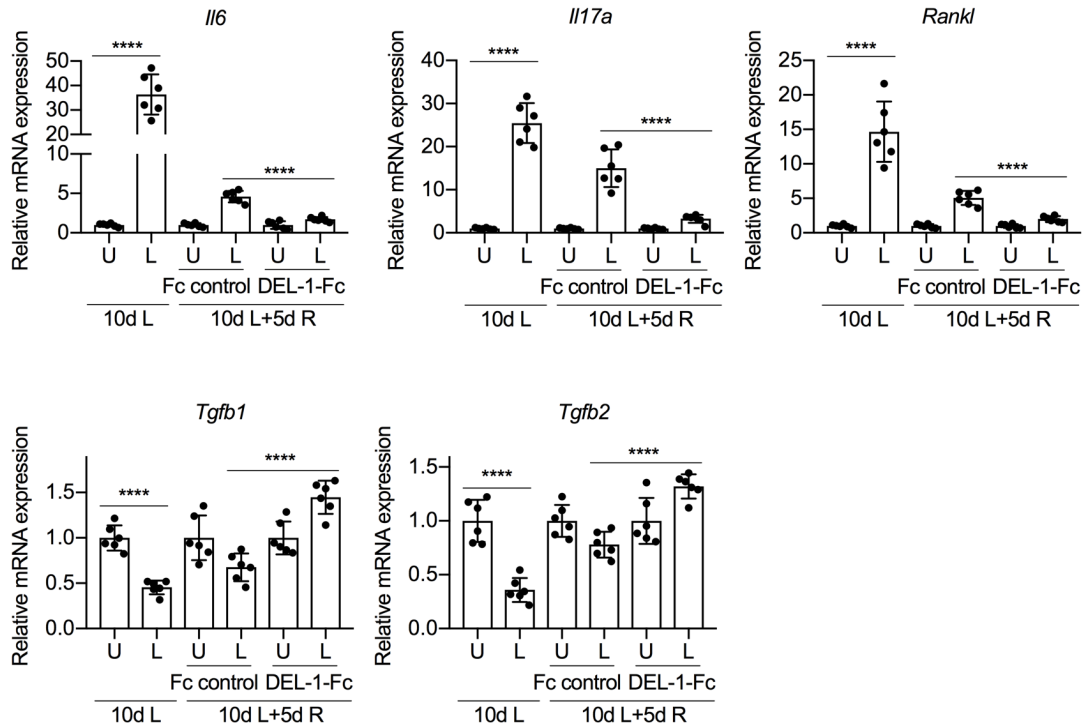

268  
 269  
 270  
 271  
 272  
 273  
 274  
 275  
 276  
 277  
 278  
 279  
 280  
 281  
 282  
 283  
 284  
 285  
 286  
 287  
 288  
 289  
 290

**Supplemental Figure 4. DEL-1-Fc promotes inflammation resolution in periodontitis.**

Groups of *Del1*<sup>KO</sup> mice were subjected to ligature-induced periodontitis (LIP) for 10 days. One group was euthanized at day 10 for dissecting gingiva for cytokine expression analysis (10d L group). In two other groups subjected to LIP, the ligatures were removed on day 10 for another 5 days to enable resolution (10dL +5dR groups). After ligature removal, the 10dL +5dR groups of mice were locally microinjected daily with DEL-1-Fc or Fc control from day 10 to day 14 for a total of 5 doses. Relative mRNA expression of the indicated molecules in the gingival tissue of the various groups was determined by quantitative real-time PCR. Data were normalized to *Gapdh* mRNA and are presented as fold change relative to baseline (unligated sites), set as 1. Data are means ± SD (*n*=6 mice per group and are pooled from two independent experiments each with three mice/group). \*\*\*\**P*<0.0001 between indicated groups. Two-tailed Student's *t*-test. U, unligated; L, ligated.

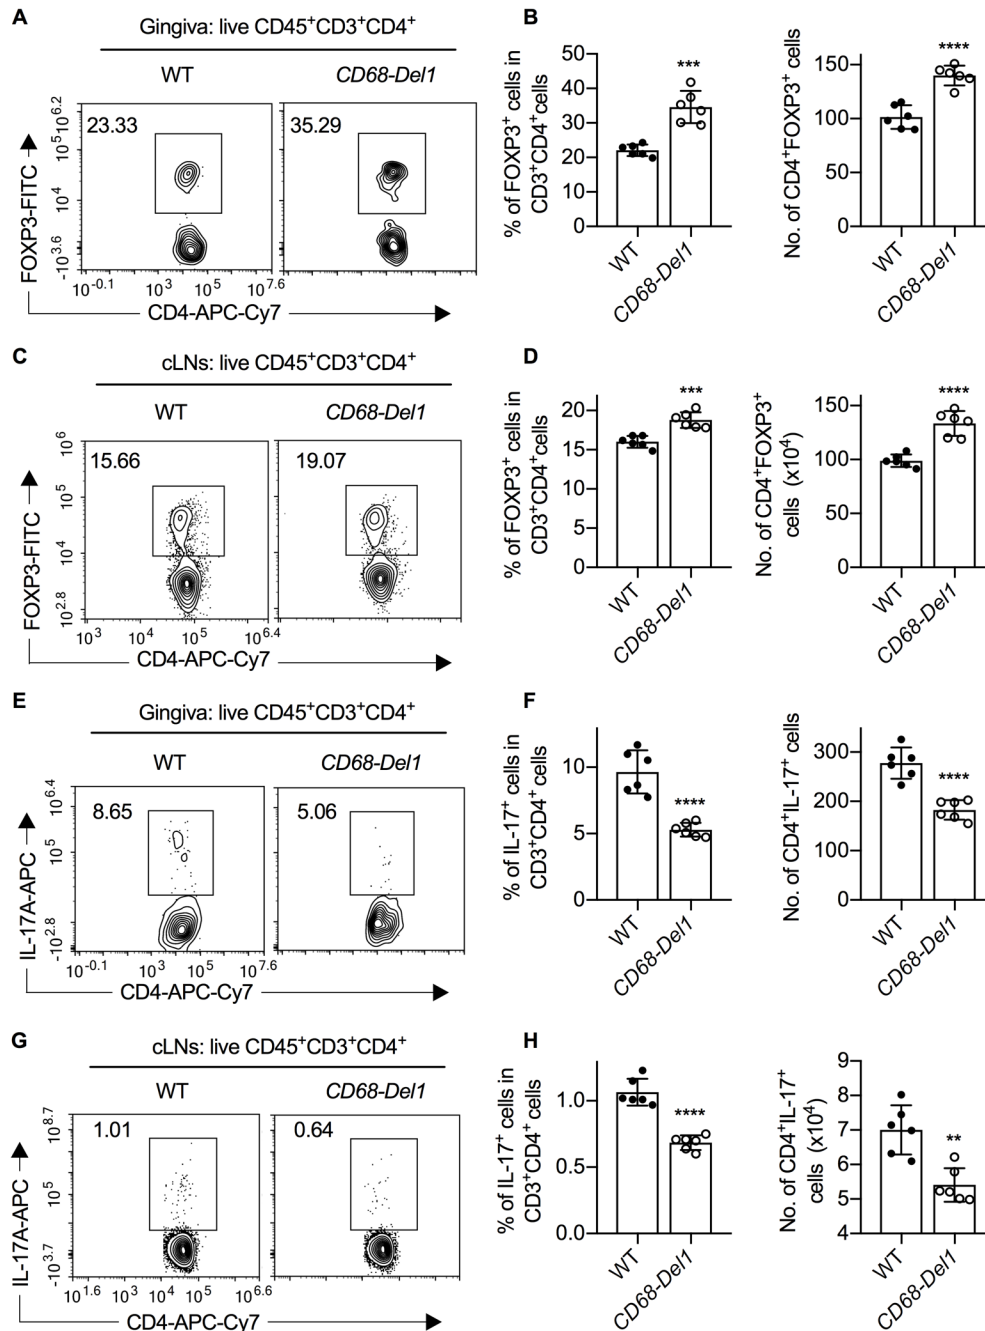

291

292 **Supplemental Figure 5. Macrophage-derived DEL-1 increases Treg cells numbers while**  
 293 **decreasing Th17 cells during resolution of inflammation.** Groups of littermate wild-type (WT)  
 294 and *CD68-Del1* mice were subjected to ligature-induced periodontitis (LIP) for 10 days and  
 295 ligatures were removed on day 10 (to facilitate inflammation resolution) for 5 days. **(A)**  
 296 Representative FACS plots of Treg cells in gingival tissue on day 15 and **(B)** bar graphs showing  
 297 percentage of Treg cells in CD4<sup>+</sup> T cells (left) and absolute numbers of Treg cells (right) from  
 298 gingival tissues of indicated mouse groups on day 15 (*n*=6 mice per group). **(C)** Representative  
 299 FACS plot of Treg cells in cervical lymph nodes (cLNs) on day 15 and **(D)** bar graphs showing  
 300 percentage of Treg cells in CD4<sup>+</sup> T cells (left) and absolute numbers of Treg cells (right) from

301 cLNs of indicated mouse groups on day 15 ( $n=6$  mice per group). **(E)** Representative FACS plots  
302 of Th17 cells in gingival tissue on day 15 and **(F)** bar graphs showing percentage of Th17 cells in  
303  $CD4^+$  T cells (left) and absolute numbers of Th17 cells (right) from gingival tissues of indicated  
304 mouse groups on day 15 ( $n=6$  mice per group). **(G)** Representative FACS plot of Th17 cells in  
305 cLNs and **(H)** bar graphs showing percentage of Th17 cells in  $CD4^+$  T cells (left) and absolute  
306 numbers of Th17 cells (right) from cLNs of indicated mouse groups on day 15 ( $n=6$  mice per  
307 group). Data are means  $\pm$ SD and are pooled from two independent experiments.  $**P<0.01$ ,  
308  $***P<0.001$ ,  $****P<0.0001$  vs. WT mice; two-tailed Student's  $t$ -test.

309  
310  
311  
312  
313  
314  
315  
316  
317  
318  
319  
320  
321  
322  
323  
324  
325  
326  
327  
328  
329  
330  
331  
332  
333  
334  
335  
336  
337  
338  
339

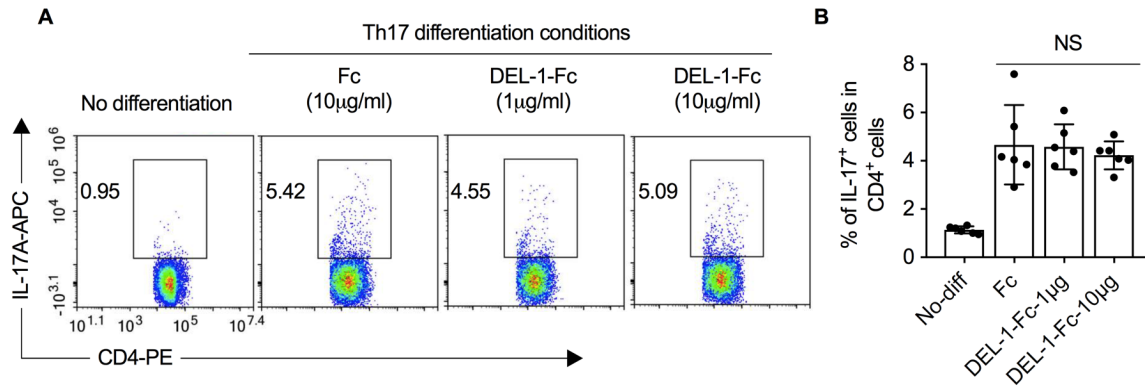

340  
 341  
 342  
 343  
 344  
 345  
 346  
 347  
 348  
 349  
 350  
 351  
 352  
 353  
 354  
 355  
 356  
 357  
 358  
 359  
 360  
 361  
 362  
 363  
 364  
 365  
 366  
 367  
 368  
 369  
 370  
 371  
 372  
 373  
 374  
 375  
 376

**Supplemental Figure 6. DEL-1 has no direct effect on in vitro Th17 differentiation (IL-6+TGFβ1 condition).** Naive splenic CD4<sup>+</sup> cells isolated from WT mice were differentiated, or not, to Th17 in medium containing anti-CD3/anti-CD28, TGFβ1 (1 ng/ml) and IL-6 (50 ng/ml) in the presence of the indicated concentrations of DEL-1-Fc or Fc control. Shown are **(A)** representative FACS plots and **(B)** data analysis of the percentage of IL-17A<sup>+</sup> cells in CD4<sup>+</sup> T cells from the in vitro culture system (*n*=6 replicates from two separate cell isolations). Data are means ± SD and are pooled from two independent experiments. NS, non-significant vs. Fc control group. One-way ANOVA with Dunnett's multiple comparisons test.

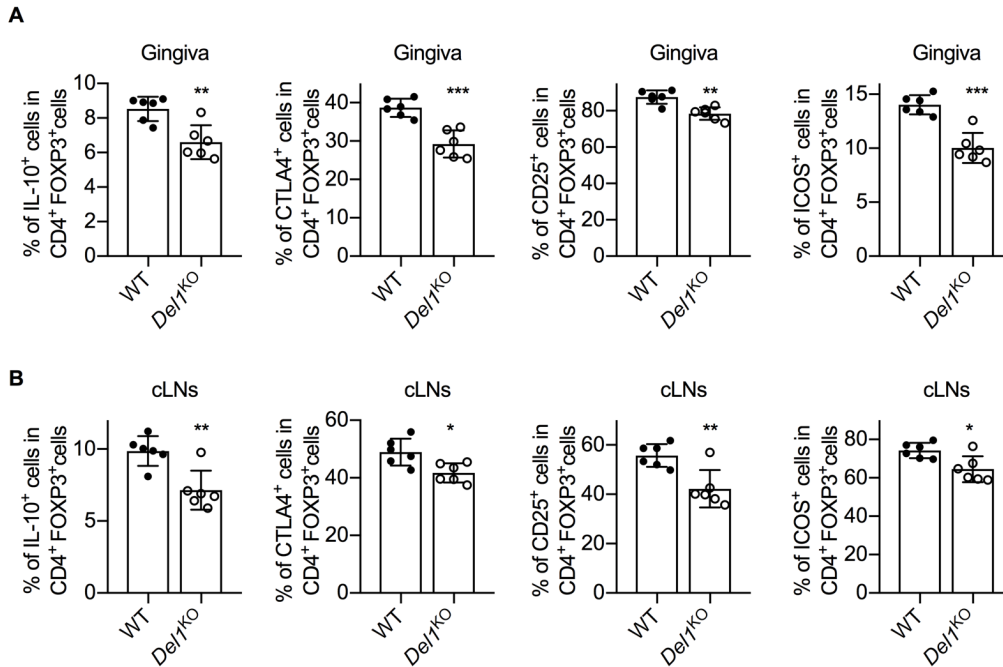

377

378 **Supplemental Figure 7. Endogenous DEL-1 promotes IL-10, CTLA-4, CD25 and ICOS**  
 379 **expression in Treg cells in vivo.** Groups of littermate wild-type (WT) and *Del1*<sup>KO</sup> mice were  
 380 subjected to ligature-induced periodontitis (LIP) for 10 days and ligatures were removed on day  
 381 10 (to facilitate inflammation resolution) for 5 days. **(A)** Percentages of IL-10, CTLA-4, CD25 and  
 382 ICOS expression in Treg cells from mice gingiva (*n*=6 mice per group). **(B)** Percentages of IL-10,  
 383 CTLA-4, CD25 and ICOS expression in Treg cells from mice cLNs (*n*=6 mice per group). Data  
 384 are means ±SD and are pooled from two independent experiments. \**P*<0.05, \*\**P*<0.01,  
 385 \*\*\**P*<0.001 vs. WT mice; two-tailed Student's *t*-test.

386  
 387  
 388  
 389  
 390  
 391  
 392  
 393  
 394  
 395  
 396  
 397  
 398  
 399  
 400



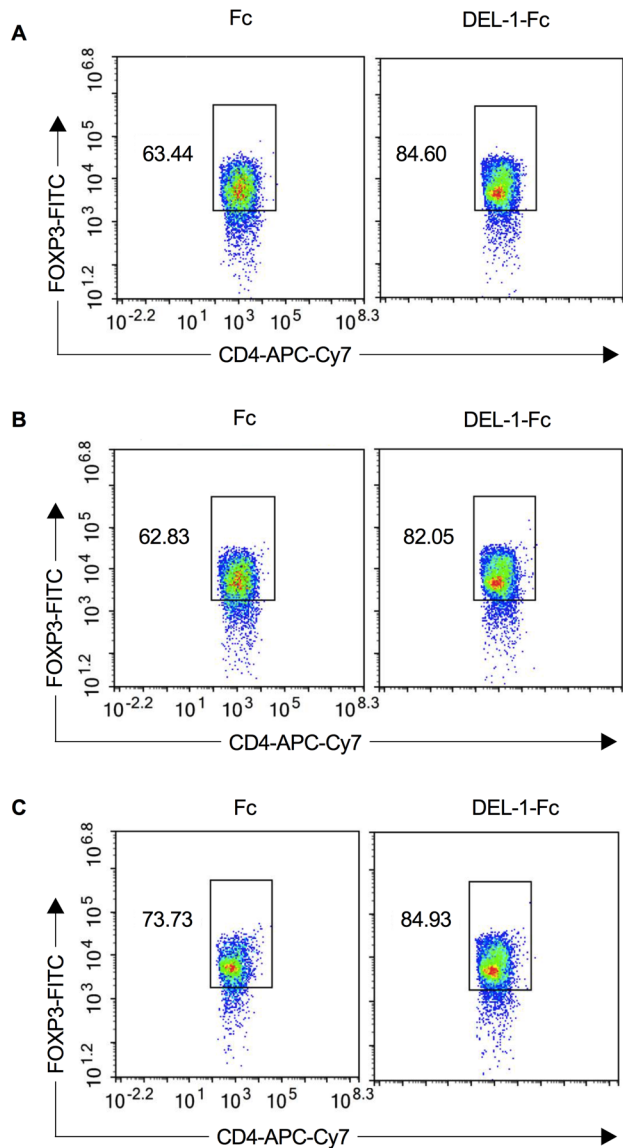

402  
 403 **Supplemental Figure 8. DEL-1 enhances FOXP3 stability.** (A) Naive splenic CD4<sup>+</sup> cells  
 404 isolated from WT mice were differentiated to Treg cells in medium containing anti-CD3/anti-CD28,  
 405 TGFβ1 (5 ng/ml) and IL-2 (40 ng/ml) in the presence of DEL-1-Fc or Fc control (all at 10 μg/ml).  
 406 CD4<sup>+</sup>CD25<sup>+</sup> cells were sorted and restimulated in medium containing IL-2 (40 ng/ml) for 4 days.  
 407 Shown are representative FACS plots of FOXP3 expression. (B,C) Naive splenic CD4<sup>+</sup> cells  
 408 isolated from WT mice were differentiated to Treg cells in medium containing anti-CD3/anti-CD28,  
 409 TGFβ1 (5 ng/ml) and IL-2 (40 ng/ml), CD4<sup>+</sup>CD25<sup>+</sup> cells were sorted and restimulated with DEL-  
 410 1-Fc or Fc control in medium containing IL-2 (40 ng/ml) alone (B) or with TGFβ1 (5 ng/ml) (C) for  
 411 4 days. Shown are representative FACS plots of FOXP3 expression.

412  
 413  
 414  
 415

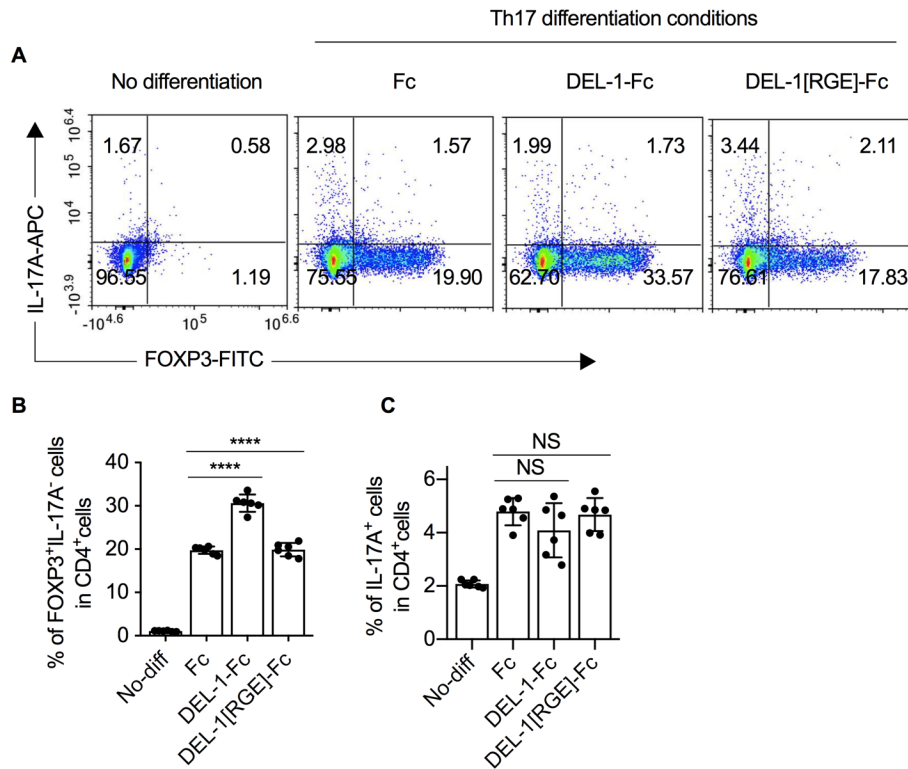

416  
 417 **Supplemental Figure 9. DEL-1 promotes FOXP3 expression in T cells cultured under Th17**  
 418 **differentiation conditions.** Naive splenic CD4<sup>+</sup> cells isolated from WT mice were cultured under  
 419 Th17 differentiation conditions (medium containing anti-CD3/anti-CD28, 1 ng/ml TGFβ1 and 50  
 420 ng/ml IL-6) in the presence of 10 μg/ml of DEL-1-Fc, DEL-1[RGE]-Fc or Fc control. Shown are  
 421 **(A)** representative FACS plots and data analysis of the percentage of **(B)** FOXP3<sup>+</sup>IL-17A<sup>-</sup> cells  
 422 and **(C)** IL-17A<sup>+</sup> cells in CD4<sup>+</sup> T cells from the in vitro culture system (*n*=6 replicates from two  
 423 separate cell isolations). Data are means ± SD and are pooled from two independent experiments.  
 424 \*\*\*\**P*<0.0001 vs. Fc control group. NS, non-significant. One-way ANOVA with Dunnett's multiple  
 425 comparisons test.

426  
 427  
 428

429

430

431

432

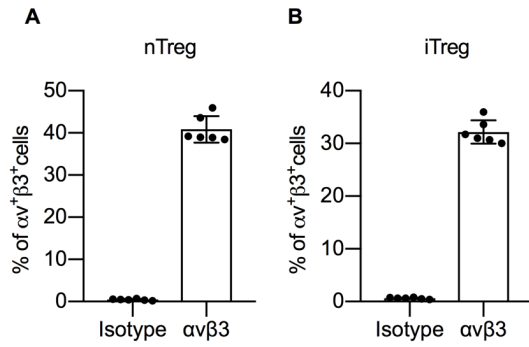

433

434 **Supplemental Figure 10.  $\alpha v \beta 3$  expression on nTreg and iTreg cells.** (A) Percentages of  
 435  $\alpha v \beta 3^+$  cells in thymus derived natural Treg (nTreg) cells ( $n=6$  mice per group) and (B) in in vitro-  
 436 induced iTreg cells ( $n=6$  replicates per group). Data are means  $\pm$  SD and are pooled from two  
 437 independent experiments.

438

439

440

441

442

443

444

445

446

447

448

449

450

451

452

453

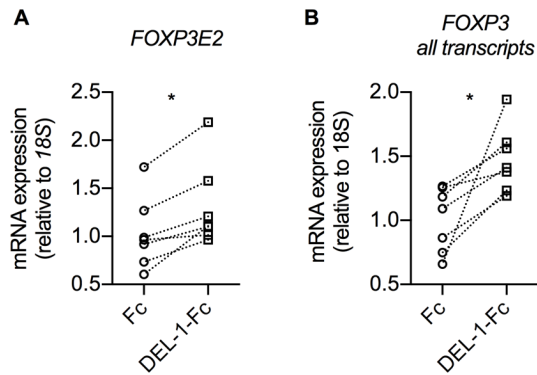

454

455 **Supplemental Figure 11. DEL-1 increases the expression of *FOXP3E2* and all *FOXP3***  
 456 **transcripts in human iTreg cells. (A,B)** Human Tconv cells were stimulated with anti-CD3/anti-  
 457 CD28 (0.1 bead per cell) in vitro, in the presence of DEL-1-Fc or Fc control (each at 10 µg/ml).  
 458 **(A)** Relative mRNA expression of *FOXP3* containing the exon 2 (*FOXP3E2*) and **(B)** *FOXP3* all  
 459 transcripts ( $n=7$  from seven independent experiments) was measured at 12 hrs of Tconv cell  
 460 stimulation during iTreg cell generation, by real-time PCR. The pair of data for each individual is  
 461 connected by a line. \* $P<0.05$  vs. Fc control. Two-tailed paired Wilcoxon test.

462

463

464

465

466

467

468

469

470

471

472

473

474

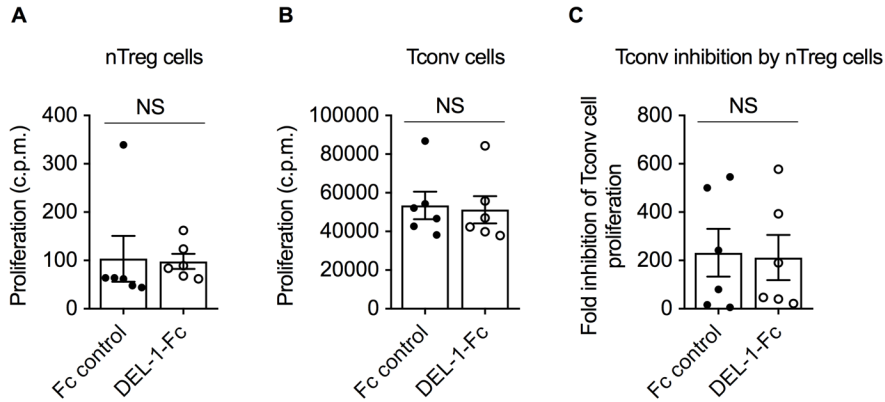

475  
476  
477  
478  
479  
480  
481  
482  
483  
484  
485  
486

**Supplemental Figure 12. DEL-1 does not affect the proliferation of nTreg and Tconv cells or the suppressive capacity of nTreg cells.** Human nTreg (**A**) and Tconv (**B**) cells were stimulated with anti-CD3/anti-CD28 (0.2 bead per cell), in the presence of DEL-1-Fc or Fc control (each at 10  $\mu$ g/ml) for 72 hrs. (**C**) Fold inhibition of Tconv cell proliferation co-cultured with nTreg cells for 72 hrs at a ratio of 1:1, in the presence of DEL-1-Fc or Fc control (each at 10  $\mu$ g/ml), presented relative to results obtained for Tconv cells stimulated with anti-CD3/anti-CD28 (0.2 bead per cell) alone. (**A,B,C**) Data analysis of (**A**) nTreg and (**B**) Tconv cell proliferation and (**C**) fold inhibition of Tconv cell proliferation. Data are means  $\pm$  SEM ( $n=6$  from six independent experiments). NS, non-significant. Two-tailed paired Wilcoxon test.

487  
488  
489  
  
490  
  
491  
  
492  
  
493  
  
494  
  
495  
  
496  
  
497  
  
498  
  
499  
  
500

501 **Supplemental Table 1. Primers used for quantitative real-time PCR analysis.**

| Genes                              | Assay ID      | Company                  |
|------------------------------------|---------------|--------------------------|
| Mouse <i>Foxp3</i>                 | Mm00475162_m1 | Thermo Fisher Scientific |
| Mouse <i>Runx1</i>                 | Mm01213404_m1 | Thermo Fisher Scientific |
| Mouse <i>Runx3</i>                 | Mm00490666_m1 | Thermo Fisher Scientific |
| Mouse <i>Cbfb</i>                  | Mm01251026_g1 | Thermo Fisher Scientific |
| Mouse <i>Il6</i>                   | Mm00446190_m1 | Thermo Fisher Scientific |
| Mouse <i>Il17a</i>                 | Mm00439618_m1 | Thermo Fisher Scientific |
| Mouse <i>Tnfsf11</i>               | Mm00441906_m1 | Thermo Fisher Scientific |
| Mouse <i>Tgfb1</i>                 | Mm01178820_m1 | Thermo Fisher Scientific |
| Mouse <i>Tgfb2</i>                 | Mm00436955_m1 | Thermo Fisher Scientific |
| Mouse <i>Gapdh</i>                 | Mm99999915_g1 | Thermo Fisher Scientific |
| Human <i>FOXP3</i> all transcripts | Hs00203958_m1 | Thermo Fisher Scientific |
| Human <i>FOXP3E2</i>               | Hs01092118_g1 | Thermo Fisher Scientific |
| Human <i>RUNX1</i>                 | Hs02558380_s1 | Thermo Fisher Scientific |
| Human <i>CBFB</i>                  | Hs00903431_g1 | Thermo Fisher Scientific |
| Human <i>RNA18S5</i>               | Hs03928990_g1 | Thermo Fisher Scientific |

502

503

504

505

506

507

508

509

510 **Supplemental Table 2. Primers used for quantitative real-time PCR analysis of human**  
 511 **and mouse iTreg methylation.**

|                                   | Primers                            |
|-----------------------------------|------------------------------------|
| Human/Mouse <i>Foxp3</i> CNS2 Fw  | 5' – GACATCACCTACCACATCC – 3'      |
| Human/Mouse <i>Foxp3</i> CNS2 Rev | 5' – TATCGGGGTCTGCATCTGG – 3'      |
| Human <i>H19</i> Fw               | 5' – GAGCCGCACCAGATCTTCAG – 3'     |
| Human <i>H19</i> Rev              | 5' – TTGGTGGAACACACTGTGATCA – 3'   |
| Human <i>UBE2B</i> Fw             | 5' – CTCAGGGGTGGATTGTTGAC – 3'     |
| Human <i>UBE2B</i> Rev            | 5' – TGTGGATTCAAAGACCACGA – 3'     |
| Mouse <i>H19</i> Fw               | 5' – CCCCAACTTTGCCATAAGTACGAT – 3' |
| Mouse <i>H19</i> Rev              | 5' – GTCTGGTGATTTGCGCTTTCGTAT – 3' |
| Mouse <i>UBE2B</i> Fw             | 5' – TGGAGCCCTTTTAAAAGCTC – 3'     |
| Mouse <i>UBE2B</i> Rev            | 5' – CCTGGGACTCACAATGTATAC – 3'    |

512

513

514

515

516

517

518

519

520

521
